# Supplementary material for: Plasma density gradients at the edge of polar ionospheric holes: the presence and absence of phase scintillation
Source: Copernicus journal article supplement (doi:10.5194/angeo-2019-112), 2019-09-03
Supplement: Supplementary file [file angeo-2019-112-SC2-supplement.pdf]

1  
2  
3  
4  
5  
6  
7  
8  
9  
10  
11  
12  
13  
14  
15  
16  
17  
18  
19  
20  
21  
22  
23  
24  
25  
26

# Plasma density gradients at the edge of polar ionospheric holes: The absence of phase scintillation

Luke A. Jenner,<sup>[1]</sup> Alan G. Wood<sup>[1]</sup>, Gareth D. Dorrian<sup>[1]</sup>, Kjellmar Oksavik<sup>[2, 3]</sup>, Timothy K. Yeoman<sup>[4]</sup>, Alexandra R. Fogg<sup>[4]</sup>, and Anthea J. Coster<sup>[5]</sup>

<sup>[1]</sup> School of Science & Technology, Nottingham Trent University, Nottingham, UK.

<sup>[2]</sup> Birkeland Centre for Space Science, Department of Physics and Technology, University of Bergen, Bergen, Norway

<sup>[3]</sup> Arctic Geophysics, University Centre in Svalbard, Longyearbyen, Norway

<sup>[4]</sup> Department of Physics and Astronomy, University of Leicester, Leicester, UK.

<sup>[5]</sup> MIT Haystack Observatory, Massachusetts, USA.

## Abstract

Polar holes were observed in the high-latitude ionosphere during a series of multi-instrument case studies close to the northern hemisphere winter solstice in 2014 and 2015. These holes were observed during geomagnetically quiet conditions and under a range of solar activities using the European Incoherent Scatter Scientific Association (EISCAT) Svalbard Radar (ESR) and measurements from Global Navigational Satellite System (GNSS) receivers. Steep electron density gradients have been associated with phase scintillation in previous studies, however, no enhanced scintillation was detected within the electron density gradients at these boundaries. It is suggested that the lack of phase scintillation may be due to low plasma density levels and a lack of intense particle precipitation. It may be that both significant electron density gradients and that plasma density levels above a certain threshold are required for scintillation to occur.

## Introduction

27 The F-region ionosphere is a weakly ionised plasma in the Earth's atmosphere extending from  
28 an altitude of ~150 to ~500 km, above which it merges with Earth's plasmasphere. Large-scale  
29 plasma structures with a horizontal extent of tens to hundreds of km are routinely observed  
30 in the F-region high-latitude ionosphere (Tsunoda, 1988). One type of structure commonly  
31 observed are polar cap patches, also referred to as patches, which are enhancements of  
32 plasma density with at least twice the background value and have a horizontal spatial extent  
33 of 100 km or greater (Crowley, 1996). Buchau et al. (1983) observed such patches of enhanced  
34 ionisation drifting antisunward with the background plasma flow in the central region of the  
35 polar cap at Thule, Greenland (77.5° N, 69.2° W; 85.4° MLAT, 32.4° MLON). The patch densities  
36 were larger than could be produced due to the observed flux of precipitating particles, and it  
37 was concluded that the patches were not produced locally by precipitation. Weber et al.  
38 (1984) suggested that the patches were produced on the dayside at auroral or subauroral  
39 latitudes and then convected antisunward to higher, polar latitudes. A comparison of average  
40 maps of the electron density and high-latitude convection pattern suggested that solar-  
41 produced plasma was drawn into the polar cap as a continuous density enhancement known  
42 as the Tongue-of-Ionisation (TOI) (Foster et al., 1984). Several mechanisms have been  
43 proposed to break a TOI into a series of patches, including variations in the high-latitude  
44 convection pattern moving flux tubes in and out of sunlight (Anderson et al., 1988), expansion  
45 and contraction of the high-latitude convection pattern in response to transient bursts of  
46 reconnection drawing in plasma from different latitudes (Cowley and Lockwood, 1992;  
47 Lockwood and Carlson, 1992; Carlson et al., 2002, 2004, 2006), variations in the y-component  
48 of the Interplanetary Magnetic Field (IMF) drawing in plasma from different magnetic local  
49 times (MLT) (Sojka et al., 1993), variation of the z-component of the IMF altering whether  
50 plasma could be drawn in to the polar cap (Valladares et al., 1998), erosion of plasma densities  
51 due to enhanced recombination during a flow channel event (Rodger et al., 1994; Valladares  
52 et al., 1994), and modification of the density of the photoionised plasma transported into the  
53 polar cap by particle precipitation (Walker et al., 1999; Millward et al., 1999). Patches have  
54 been observed travelling thousands of kilometres across the polar regions (Weber, 1986;  
55 Oksavik et al., 2010; Nishimura et al., 2014), and are primarily associated with times when the  
56 z-component of the IMF is negative (Buchau and Reinisch, 1991).

57 Blobs are also plasma density enhancements, however, unlike patches, they occur outside the  
58 polar cap. They are further categorised into boundary blobs, subauroral blobs, and auroral  
59 blobs (Rino, 1983; Jin et al., 2016). Boundary blobs are found near the equatorward auroral  
60 boundary, neighbouring the ionospheric trough's poleward wall. Parkinson et al. (2002)  
61 observed patches leaving the polar cap, slowing in the antisunward direction and then  
62 beginning to move zonally. It was suggested that these patches would form boundary blobs,  
63 and this was later confirmed by Pryse et al. (2006) who compared the plasma density in a  
64 polar cap patch to that within a boundary blob which the patch subsequently formed.  
65 Subauroral blobs have a similar appearance to boundary blobs, however, they are found in  
66 the ionospheric trough. Auroral blobs are found within the auroral oval and seem to be  
67 longitudinally restricted. The most likely mechanism for their creation is particle precipitation  
68 (Jones et al., 1997).

69 Not all ionospheric structures are enhancements of the background plasma; polar ionospheric  
70 holes are regions of low plasma density. Brinton et al. (1978) observed a depletion of this kind  
71 under conditions of low solar activity ( $F_{10.7}=71$  sfu) and low magnetic activity ( $K_p = 2$ ). This  
72 depletion was also associated with a minimum of electron temperatures, indicating the  
73 absence of local particle precipitation. Polar holes are generally located between 21 and 06  
74 MLT and  $70^{\circ}$ - $80^{\circ}$  magnetic latitude and typically have steep plasma density gradients at their  
75 boundaries. They are believed to be produced when plasma in the high-latitude convection  
76 pattern circulates in perpetual darkness. Plasma loss by recombination in the absence of a  
77 plasma source causes density levels to drop. This idea is supported by the conditions under  
78 which polar holes have generally been observed, namely quiet geomagnetic activity ( $K_p$  2 or  
79 less) when the contribution to the plasma densities from particle precipitation will be low  
80 (Brinton et al., 1978). The electron densities inside of the polar holes are seen to reach a  
81 minimum in the range of  $10^8$ - $10^{11}$  electrons·m<sup>-3</sup> (Obara and Oya, 1989, Benson and  
82 Grebowsky, 2001) and, while there is variation between holes, inside of a singular polar hole  
83 the density level is very consistent.

84 Smaller scale structures can arise at steep plasma density gradients due to instability  
85 processes such as the gradient-drift instability (GDI) (Keskinen and Ossakow, 1983) and the  
86 velocity shear driven instability (Kelvin-Helmholtz instability, KHI). Carlson et al. (2008)  
87 proposed and that the real process involves both mechanisms acting on different time scales.

88 The smaller scale (tens of meters to tens of kilometers) plasma density structures that arise  
89 cause variations in the refractive index of the ionosphere. As a GNSS signal passes through  
90 this region, refraction and/or diffraction of the radio wave causes fluctuations in the phase  
91 and amplitude of the signal. Ionospheric scintillation is the rapid fluctuation of the received  
92 signal which can disrupt applications using GNSS, as thoroughly reviewed by Hapgood (2017).

93 . Since the second world war, large numbers of studies have shown the effect of ionospheric  
94 irregularities on radio signals, as reviewed by Aarons (1982). The morphology of these  
95 irregularities has been extensively studied at high-latitudes (e.g. Kersley, 1972), together with  
96 the effects upon the propagation of radio signals in this region (e.g. Kersley et al., 1995).

97 More recently studies have focussed on Global Navigation Satellite System (GNSS)  
98 frequencies, where scintillation poses a substantial threat to the integrity, availability and  
99 accuracy of GNSS positioning, leading to positioning errors and service outages due to signal  
100 tracking problems at the GNSS receiver. A direct connection between gradients in the Total  
101 Electron Content (TEC) at the edge of a plasma stream with both phase and amplitude  
102 scintillation has been observed (Mitchell et al., 2005) and plasma structuring caused by  
103 auroral precipitation has been linked to the loss of signal lock by a GNSS receiver (Elmas et al.,  
104 2011; Smith et al., 2008; Oksavik et al., 2015). A statistical study has shown an agreement  
105 between both phase and amplitude scintillation with the asymmetric distribution of polar cap  
106 patches around magnetic midnight (Spogli et al., 2009) and that auroral emissions correlate  
107 with GNSS signal phase scintillation (Kinrade et al., 2013; van der Meeren et al., 2015). Phase  
108 and amplitude scintillation can be associated with the larger spatial structures associated with  
109 polar cap patches (Alfonsi et al., 2011). The climatology of ionospheric scintillation at polar  
110 latitudes in the northern hemisphere was determined over almost two solar cycles, and the  
111 dependence upon solar cycle, geomagnetic activity and solar wind conditions was shown by  
112 De Francheschi et al. (2019). Phase scintillation is usually the dominant process at high latitudes  
113 (Spogli et al., 2009; Prikryl et al., 2015) and this is the focus of the present study.

114 Phase scintillation is commonly quantified by the standard deviation of the signal phase,  
115  $\sigma_{\phi}$ , which is usually computed across 60 seconds. The refractive component of the signal is  
116 usually assumed to be slowly varying and associated with frequencies of less than 0.1 Hz.  
117 Therefore, by only considering frequencies greater than 0.1 Hz, the diffractive effects (usually

118 referred to as scintillation) can be distinguished (Fremouw et al., 1978). However, the 0.1 Hz  
119 cutoff can give spurious observations of phase scintillation as a result of erroneous data  
120 detrending (Forte and Radicella, 2002). When a GNSS satellite is observed at low elevation  
121 angles the  $\sigma_\phi$  index cannot distinguish between phase scintillation and background noise for  
122 weak to moderate phase scintillation (Forte, 2005). Wang et al. (2018) showed that rapid  
123 variations in the phase of a trans-ionospheric signal can arise as a result of plasma structures  
124 moving rapidly relative to an observer at ground level, and so can give the appearance of  
125 phase scintillation. Rapid changes in the spatial distribution of electron density can also  
126 introduce similar effects as the GNSS satellite-to-receiver ray path can sweep through these  
127 irregularities at high speed, resulting in high-frequency refractive variations (McCaffrey and  
128 Jayachandran, 2019).

129 The presence or absence of scintillation effects on trans-ionospheric radio signals have been  
130 extensively studied for electron density enhancements in the high-latitude ionosphere, but  
131 the effect of the steep plasma density gradients at the edge of depletions, such as polar holes  
132 are not as extensively studied. The purpose of this paper is to report on the effects of such  
133 steep density gradients on GNSS signals, observed in three multi-instrument case studies  
134 close to winter solstice.

## 135 **Instrumentation**

136 The European Incoherent Scatter Scientific Association (EISCAT) operates the EISCAT Svalbard  
137 Radar (ESR) at Longyearbyen (78.2° N, 16.0° E; 15.2° MLAT, 112.9° MLON) on Svalbard  
138 (Wannberg et al., 1997). The site consists of two antennas, a 32-meter parabolic dish and a  
139 42-meter parabolic dish. The 42 m dish is fixed along the direction of the local geomagnetic  
140 field lines (azimuth -179°; elevation 81.6°), while the 32 m dish is steerable in both azimuth  
141 and elevation. Observations of the electron density, electron temperature, ion temperature,  
142 and ion drift line of sight velocity in the ionosphere from this incoherent scatter radar (ISR)  
143 are used in this study.

144 The Super Dual Auroral Radar Network (SuperDARN) is a network of high latitude coherent  
145 scatter radars (Greenwald et al., 1995; Chisham et al., 2007; Nishitani et al., 2019) that observe  
146 line-of-sight plasma velocities in the F-region. These measurements are assimilated using the  
147 map potential technique (Ruohoniemi and Baker, 1998), which uses an ionospheric

148 convection model to map the electrostatic potential pattern. Electrostatic equipotential lines  
149 are streamlines of ionospheric convection flows. As the plasma drift velocity is perpendicular  
150 to both the electric and magnetic fields in the F-region ( $\underline{E} \times \underline{B}$  drift) the plasma convection  
151 pattern can be directly inferred from the electric potential maps.

152 GNSS signals detected by NovAtel GPStation-6 receivers at the Kjell Henriksen Observatory  
153 (KHO) (78.2° N, 16.0° E; 15.2° MLAT, 112.9° MLON) can be used to infer the effects of the  
154 ionosphere on radio waves traveling through this medium. Amplitude scintillation is measured  
155 using the  $S_4$  index, which is the square root of the variance of received power divided by the  
156 mean value of the received power (Briggs and Parkin, 1963). Phase scintillation is measured  
157 using the  $\sigma_\phi$  index, which is the standard deviation of the detrended carrier phase  $\phi$  in radians  
158 (Fremouw et al., 1978) over 60 seconds.

159 The IMF was observed by the Advanced Composition Explorer (ACE), which is a NASA  
160 Spacecraft orbiting the L1 Lagrangian point of the Earth Sun system, roughly 1.54 million km  
161 from the Earth (Zwickl et al., 1998). In addition to the x-, y- and z- components of the IMF the  
162 clock angle, given by  $\arctan \frac{|B_y|}{|B_z|}$ , is also considered. When the clock angle is greater than 45  
163 degrees either  $|B_y| > |B_z|$  or  $B_z < 0$ , in either case a two cell convection pattern is expected with  
164 antisunward flow drawing plasma from day to night across the polar cap (Thomas and  
165 Shepherd, 2018).

166 Total Electron Content (TEC) maps are used to put these measurements into context. These  
167 were obtained from the Madrigal Database at the MIT Haystack Observatory (Ridout and  
168 Coster, 2006; Vierinen et al., 2015). Two other indices are used within this study. The  $K_p$  index  
169 is used as a proxy for disturbances to the geomagnetic field. The F10.7 cm solar flux is used as  
170 a proxy for solar activity. These indices were both obtained from the UK Solar System Data  
171 Centre (UKSSDC) at Rutherford Appleton Laboratory, UK.

## 172 **Results**

### 173 **Case study: 17<sup>th</sup> December 2014**

174 The 3-hourly  $K_p$  values observed on 17<sup>th</sup> December 2014 between 12:00 and 23:59 UT ranged  
175 between 1- and 1+, indicating quiet conditions. The F10.7 cm solar flux was relatively high,

176 the value of 198.5 sfu is typical of solar maximum. The IMF observed by the ACE spacecraft  
177 between 12:00 and 23:59 UT (Fig. 1) was characterised by a positive value for the IMF  $B_y$  (mean  
178 value 3.9 nT). IMF  $B_z$  was more variable, but generally took smaller values (mean value of 1.7  
179 nT). The clock angle was generally greater than  $45^\circ$  from 14 UT until 19 UT, and the  
180 corresponding SuperDARN plots (discussed later in this section) show that a two cell  
181 convection pattern dominated until at least 20 UT.

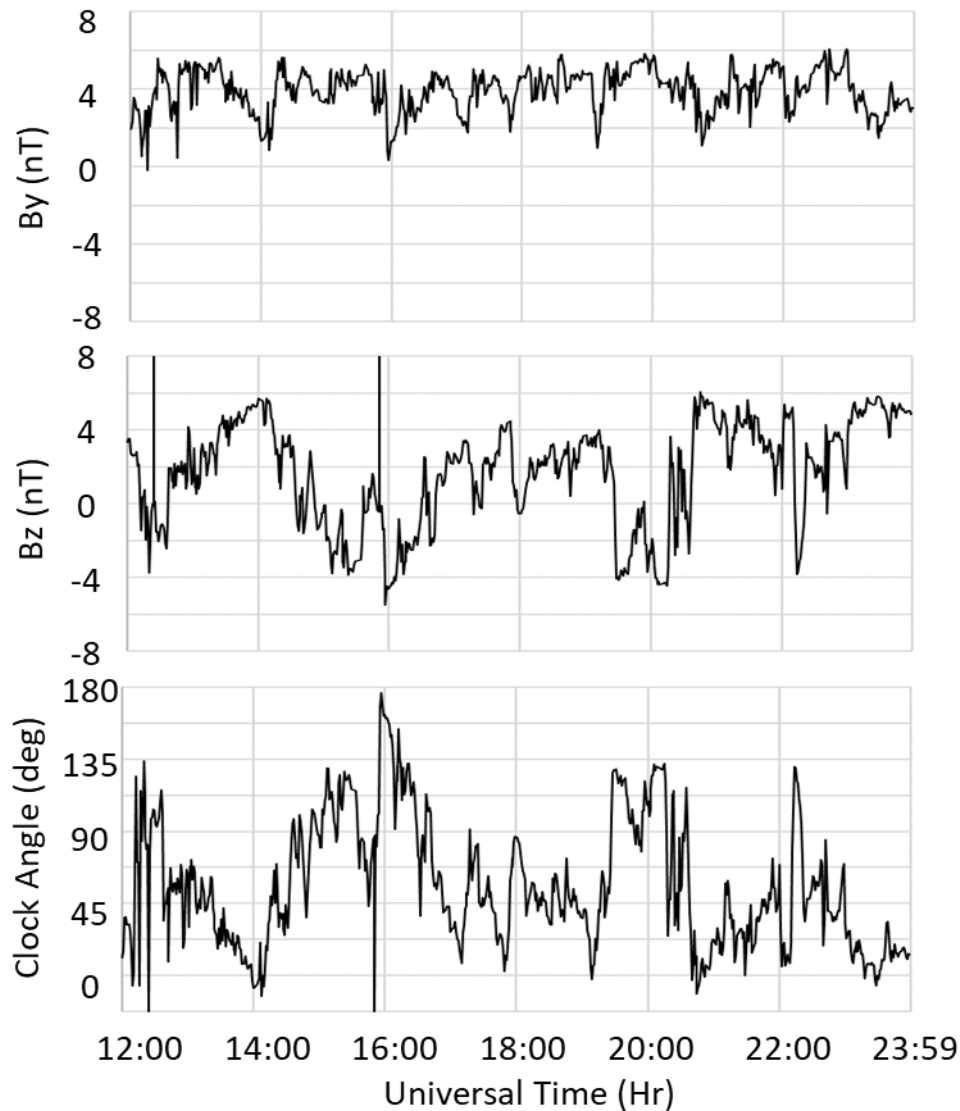

182

183 **Fig. 1.** The  $y$ - and  $z$ -components of the IMF, and the clock angle observed by the ACE  
184 spacecraft between 12:00 UT and 23:59 UT on 17<sup>th</sup> December 2014. The data have been time  
185 shifted to the nose of the Earth's bow shock.

186 Total Electron Content (TEC) maps (Fig. 2) show the overall plasma density throughout the  
 187 high-latitude regions. The TEC maps at 12 UT and 15 UT show values of  $\sim 2$  TECu (dark blue  
 188 colour) in the polar cap. At 18 UT at 21 UT larger electron densities can be observed crossing  
 189 the polar cap in a two cell convection pattern, with values of  $\sim 15$  TECu (yellow colour),  
 190 indicating that plasma produced by photoionisation on the dayside is being drawn into the  
 191 polar cap. This plasma is being drawn into the polar cap during relatively quiet conditions  
 192 ( $K_p \sim 1$ ) and is consistent with a two cell convection pattern.

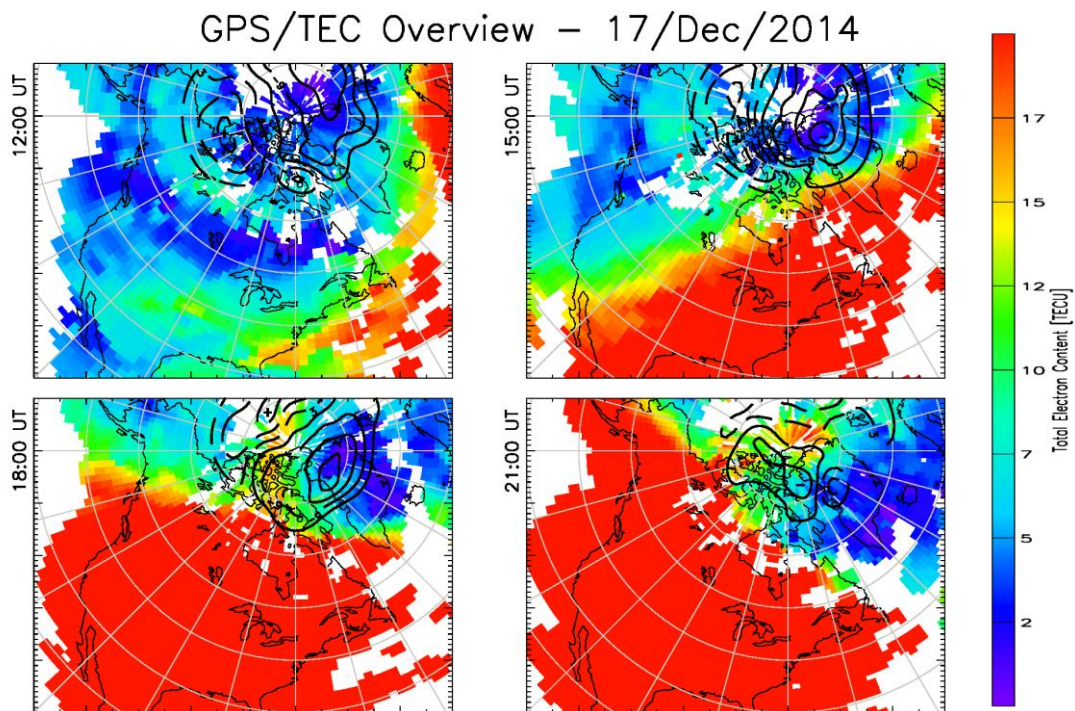

193

194 **Fig. 2. TEC maps for the 17<sup>th</sup> December 2014 extrapolated from TEC collected by a network**  
 195 **of GNSS receivers at three hourly intervals between 12 UT and 21 UT.**

196 The electron densities and temperatures observed by the field-aligned 42 m dish of the EISCAT  
 197 Svalbard Radar (ESR) between 12:00 UT and 23:59 UT are shown in Fig. 3. The scales on this  
 198 plot have been chosen to enable a clear comparison with other figures presented in this  
 199 paper. A clear depletion in the electron densities is observed between approximately 16 and  
 200 18 UT at all altitudes. The electron and ion temperatures are not elevated at this time with  
 201 values of approximately 1000 K, suggesting that this depletion is void of particle precipitation  
 202 and did not arise from enhanced recombination due to Joule heating. The ESR does not show  
 203 a substantial plasma velocity aligned with the radar beam. This radar observed at an elevation



204 of  $81.6^\circ$  which is aligned with the magnetic field line in the F-region. There was no substantial  
 205 component of velocity observed along the magnetic field line. In order to further investigate  
 206 the electron density depletion, a line plot of the maximum detected electron density from 90-  
 207 400 km is shown (Fig. 4). In addition to the maximum density two other values are present on  
 208 the plot, the average value for the whole day, and 35% of the average value. The depletion  
 209 was defined as when the electron density dropped below the 35% line and, in this case, the  
 210 depletion was defined as starting at 16:29 UT and ending at 18:00 UT.

211

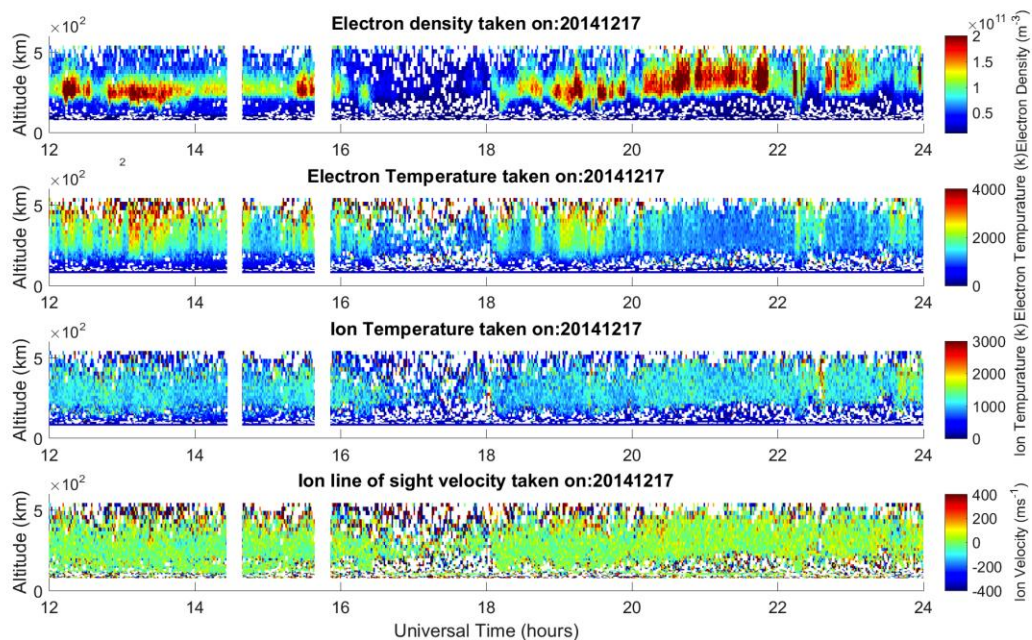

212

213 **Fig. 3. Electron densities, electron temperatures, ion temperatures, and ion drift line of sight**  
 214 **velocity measured by the 42 m dish of the ESR observing at an azimuth of  $184.5^\circ$  and an**  
 215 **elevation of  $81.6^\circ$  between 12:00 UT and 23:59 UT on 17<sup>th</sup> December 2014.**

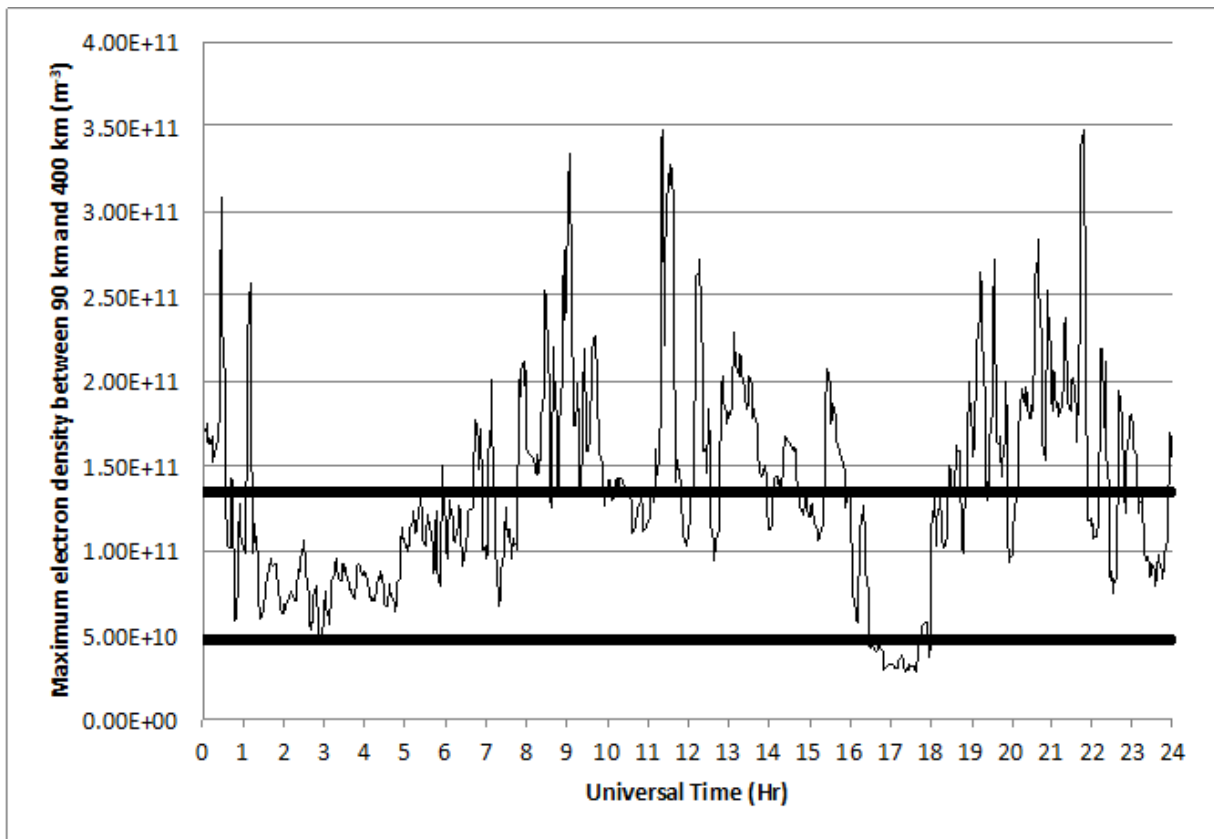

216

217 **Fig. 4. Maximum electron density between 90 and 400 km for ESR 42 m observation on the**  
 218 **17<sup>th</sup> December 2014 at one minute resolution. A five point running mean was applied to**  
 219 **these data. The upper horizontal line is the average value and the lower horizontal line is**  
 220 **35% of the average. A hole can be seen between 16:29 and 18:00 UT.**

221 Fig. 5 shows the high-latitude convection pattern inferred from the SuperDARN radars for  
 222 three representative times during the time that the electron density depletion was observed  
 223 by the ESR. These clearly show a two cell convection pattern, with plasma drawn antisunward  
 224 across the polar cap. The ESR observes at a given location, which rotates under the convection  
 225 pattern. The depletion identified in Fig. 4 is indicated by a black line. At midwinter Svalbard is  
 226 in perpetual darkness. On 14<sup>th</sup> December the ground level terminator is at a maximum latitude  
 227 of 68° N, which corresponds to a maximum magnetic latitude of 76° MLAT at 21 UT. This  
 228 depletion is nightward of the terminator and the SuperDARN convection patterns suggest that  
 229 this plasma is circulating in perpetual darkness. It is interpreted as a polar hole.

230

231

232

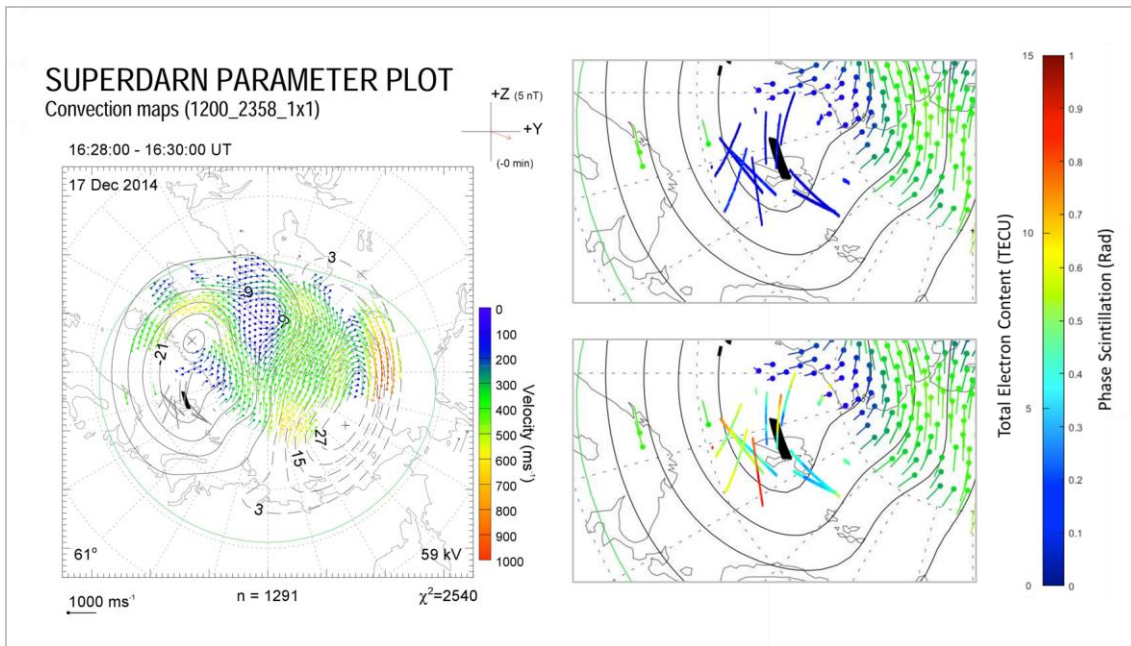

233

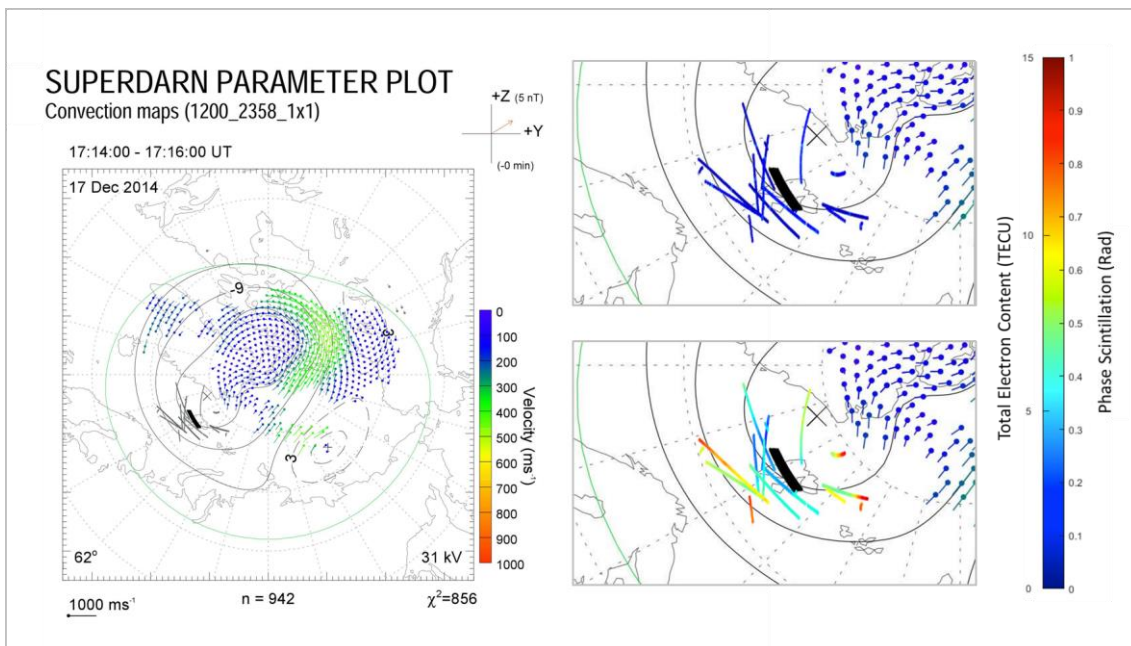

234

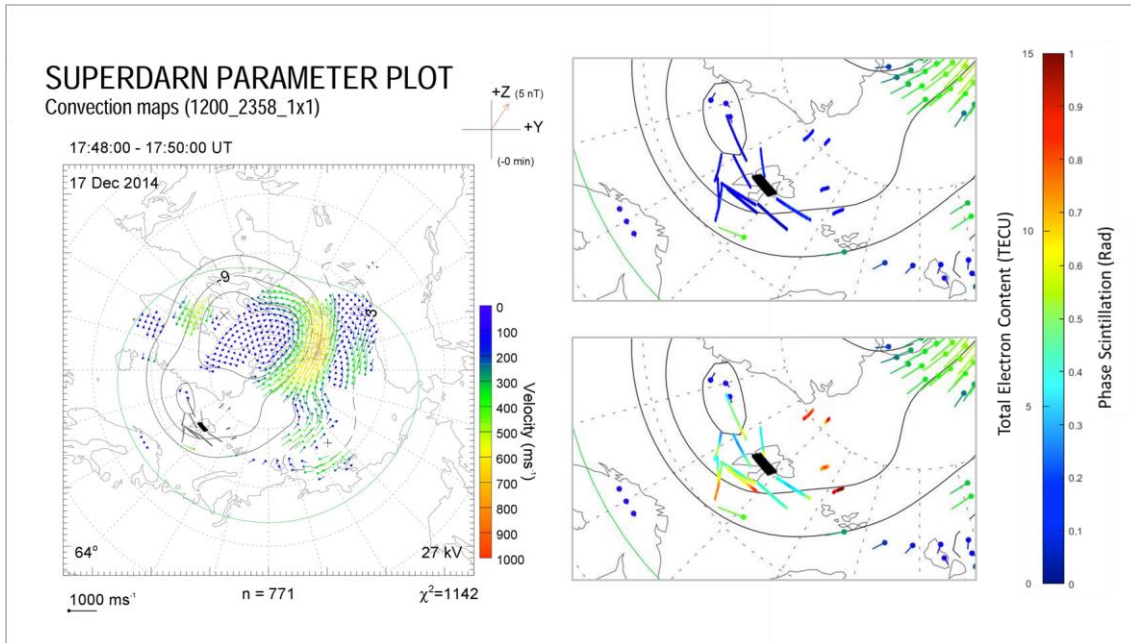

235

236 **Fig. 5. Electric potential patterns inferred from the SuperDARN radars for 16:28 UT, 17:14**  
 237 **UT, and 17:48 UT on 17<sup>th</sup> December 2014 as a function of geomagnetic latitude and magnetic**  
 238 **local time. Magnetic noon is at the top of each plot with dusk and dawn on the left- and**  
 239 **right- hand sides respectively. Magnetic latitude is indicated by the grey dashed circular lines**  
 240 **in 10.0° increments. The grey lines show the location of satellite passes from GNSS satellites,**  
 241 **assuming an ionospheric intersection of 350 km. The SuperDARN plot from 16:28 UT includes**  
 242 **satellite passes from 16:00-16:58 UT, the 17:14 UT plot includes satellite passes from 16:58-**  
 243 **17:28 UT, and the 17:48 UT plot includes satellite passes from 17:28-18:02 UT. These time**  
 244 **intervals were chosen as inspection of the whole SuperDARN data set at two minute**  
 245 **resolution indicated that the convection patterns were relatively stable during these**  
 246 **intervals. The right hand side of the panels show the area around the satellite passes in more**  
 247 **detail. The multi-coloured colours represent phase scintillation (upper panel in each pair)**  
 248 **and TEC (lower panel in each pair). The thick black line indicates the position of the polar**  
 249 **hole observed with the 42 m dish of the EISCAT Svalbard Radar.**

250 The data collected by the GNSS receiver was from the GPS, Galileo and GLONASS systems and  
 251 the receiver provides the azimuth and elevation of the satellite with respect to the receiver.  
 252 This was converted into a latitude and longitude using the radio wave path and assuming that  
 253 the data corresponds to 350 km in altitude, in line with previous studies (e.g. Cervera and  
 254 Thomas, 2006; Forte and Radicella, 2002). At low elevation angles the GNSS TEC and  
 255 scintillation data can become unreliable due to multi-path issues, so observations at an

256 elevation of less than  $30^\circ$  were discarded. This cut of has been used in previous studies, for  
257 example Mitchell et al. (2005). Signal lock times below 240 seconds were also discarded, in  
258 line with previous studies (e.g. van der Meeren et al., 2015). The satellite tracks were overlaid  
259 onto SuperDARN plots. (Fig. 5)

260 TEC and phase scintillation data from GNSS receivers were taken during times when the polar  
261 hole was observed. This hole is observed for 1.5 hours and several satellite paths are present  
262 during this time window. The GNSS TEC data clearly show lower TEC levels at and around the  
263 area marked by the ESR as a hole and, on some of the satellite trajectories, sharp changes can  
264 be seen with the edge of the hole. A one-to-one correspondence between the GNSS TEC data  
265 and the EISCAT data is neither expected or observed. It is highly likely that the polar hole will  
266 evolve during the time for which it is observed, and therefore the plots in figure 5 include both  
267 spatial and temporal variation. The ESR observes the polar hole for 91 minutes and the plasma  
268 velocity inferred from the electric potential patterns inferred from the SuperDARN radars  
269 (figure 5) at this location is of the order of  $150 \text{ ms}^{-1}$ , indicating that the polar hole has a  
270 horizontal extent of some 800 km in a direction parallel to the plasma flow. In summary the  
271 combination of the EISCAT and GNSS TEC measurements indicate that the polar hole is present  
272 for an extended period of time (of the order of hours) over a large (hundreds of km) spatial  
273 scale.

274 Panels showing the location of phase scintillation on the satellite tracks are also shown in  
275 figure 5. A threshold of 0.2 rad was used to identify phase scintillation. Different authors have  
276 used different thresholds for phase scintillation, including 0.2 rad (e.g. van der Meeren, 2015),  
277 0.25 rad (e.g. Alfonsi et al., 2011) and 0.3 rad (e.g. Kinrade et al., 2013). The purpose of using  
278 a low threshold within the present study was to ensure that any possible indication of phase  
279 scintillation was included. Since TEC and scintillation are collected simultaneously, comparing  
280 the two might be expected to show increased scintillation where there are changes in TEC.  
281 No scintillation was been seen on the edges of the holes.

## 282 **Case study 2: 10<sup>th</sup> December 2015**

283 The F10.7cm solar flux for this case was lower than in the first study, with a value of 108.5 sfu.  
284 The  $K_p$  index was higher, with values of 3 from 12 to 18 UT and values of 4 at 21 and 24 UT,  
285 indicating an active state, but not storm levels. Once again the IMF was variable, with  $B_z$  taking

286 positive and negative values.  $B_y$  was consistently larger than  $B_z$  and dominated. As in the  
287 previous case study a two cell convection pattern was observed.

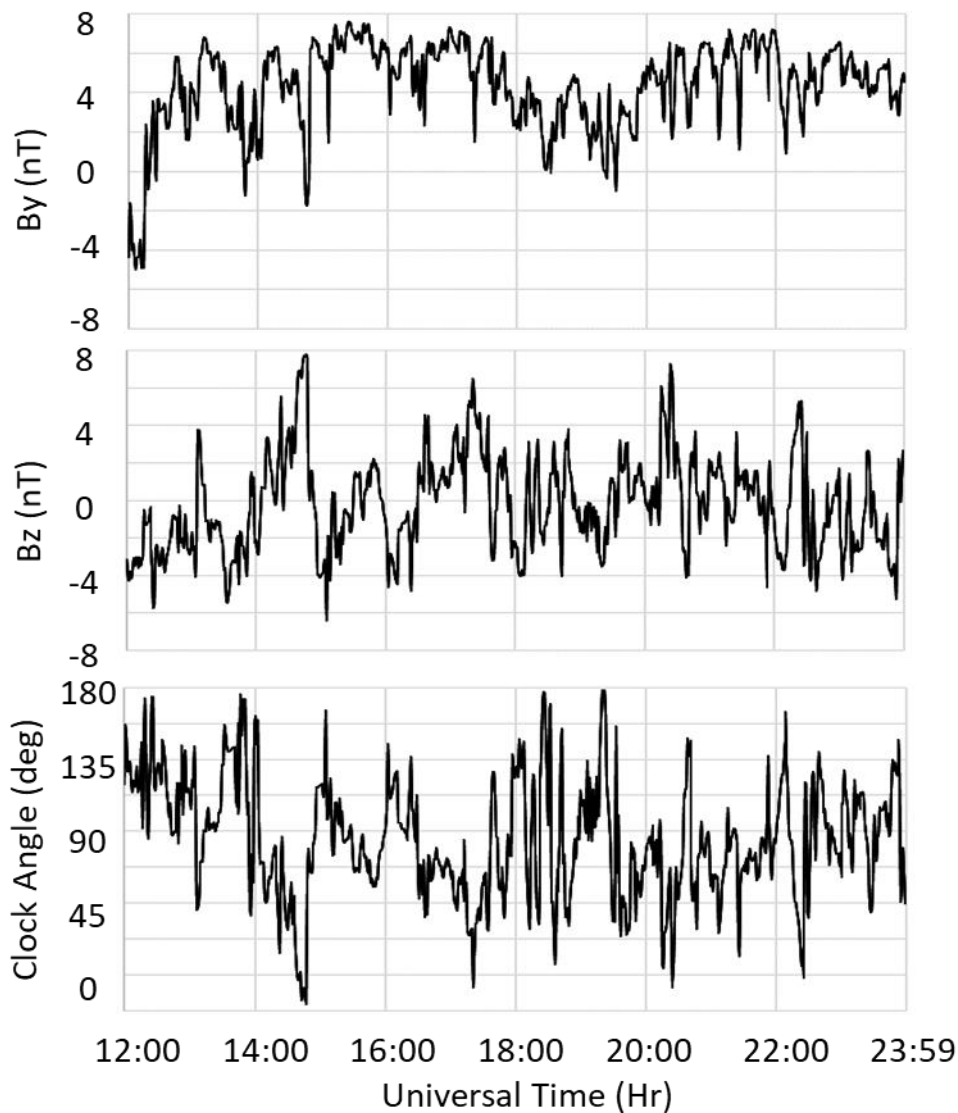

288

289 **Fig. 6. The y- and z-components of the IMF, and the clock angle observed by the ACE**  
290 **spacecraft between 12:00 and 23:59 UT on 10<sup>th</sup> December 2015, in the same format as Fig.**  
291 **1. The data have been time shifted to the nose of the Earth's bow shock.**

292

293 The TEC maps at 18 and 21 UT are shown in Fig. 7. As in the previous case study these indicate  
294 higher density plasma produced at lower latitudes being drawn across the polar cap within  
295 the high latitude convection pattern, with this effect maximising at 21 UT.

## GPS/TEC Overview – 10/Dec/2015

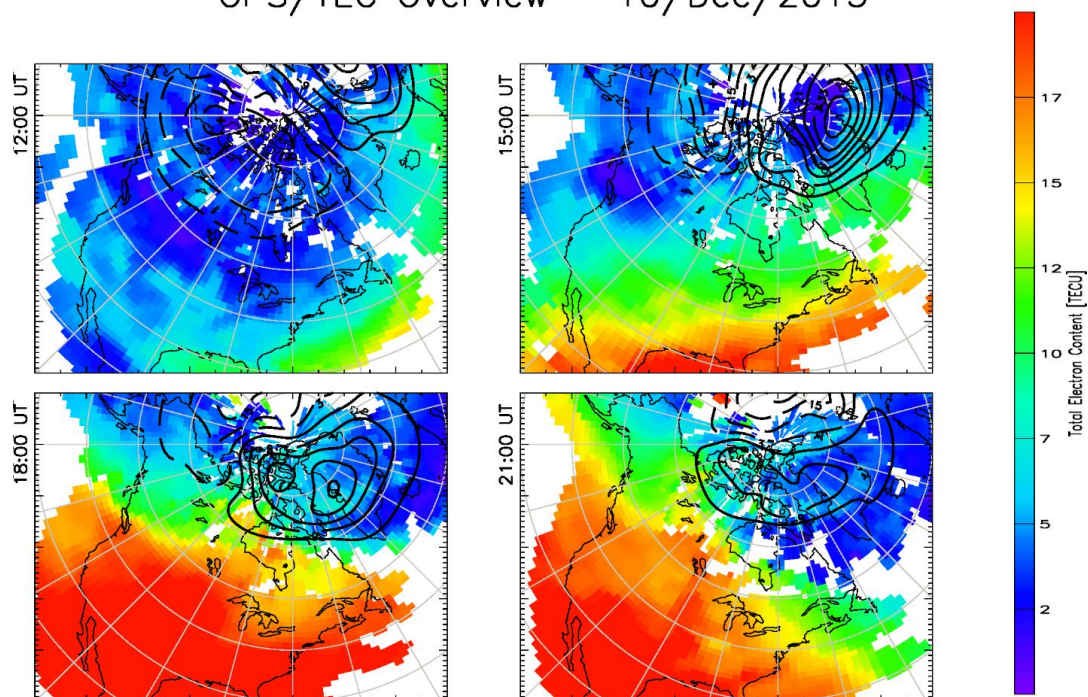

296

297 **Fig. 7. TEC maps for the 10<sup>th</sup> December 2015 extrapolated from TEC collected by a network**  
298 **of GNSS receivers at three hourly intervals between 12 and 21 UT.**

299 The 42 m ESR observations (Fig. 8) for this day show an electron density depletion that  
300 contains all the previously discussed markers, with no significant velocity in the field aligned  
301 direction.

302 Using the same method as in the previous case the hole was identified with the start and end  
303 times given as 15:15 and 16:43 UT. The 32 m ESR observations (Fig. 15) show a depletion at  
304 around 15 UT.

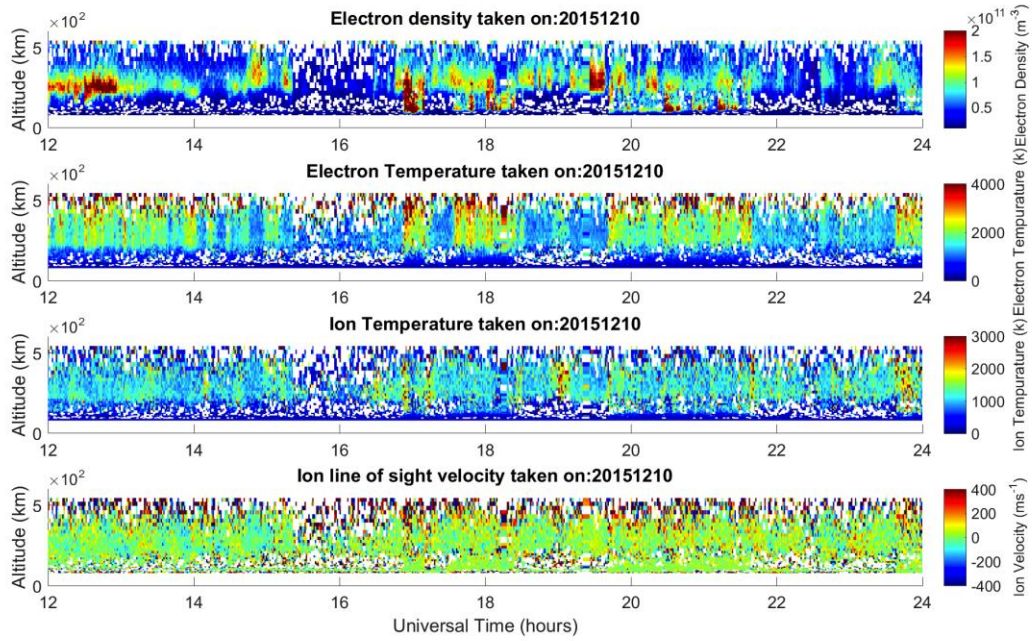

305

306 **Fig. 8. Electron densities, electron temperatures, ion temperatures, and ion drift line of sight**  
 307 **velocity measured by the 42 m dish of the ESR observing at an azimuth of 184.5° and an**  
 308 **elevation of 81.6° between 12:00 and 23:59 UT on 10<sup>th</sup> December 2015.**

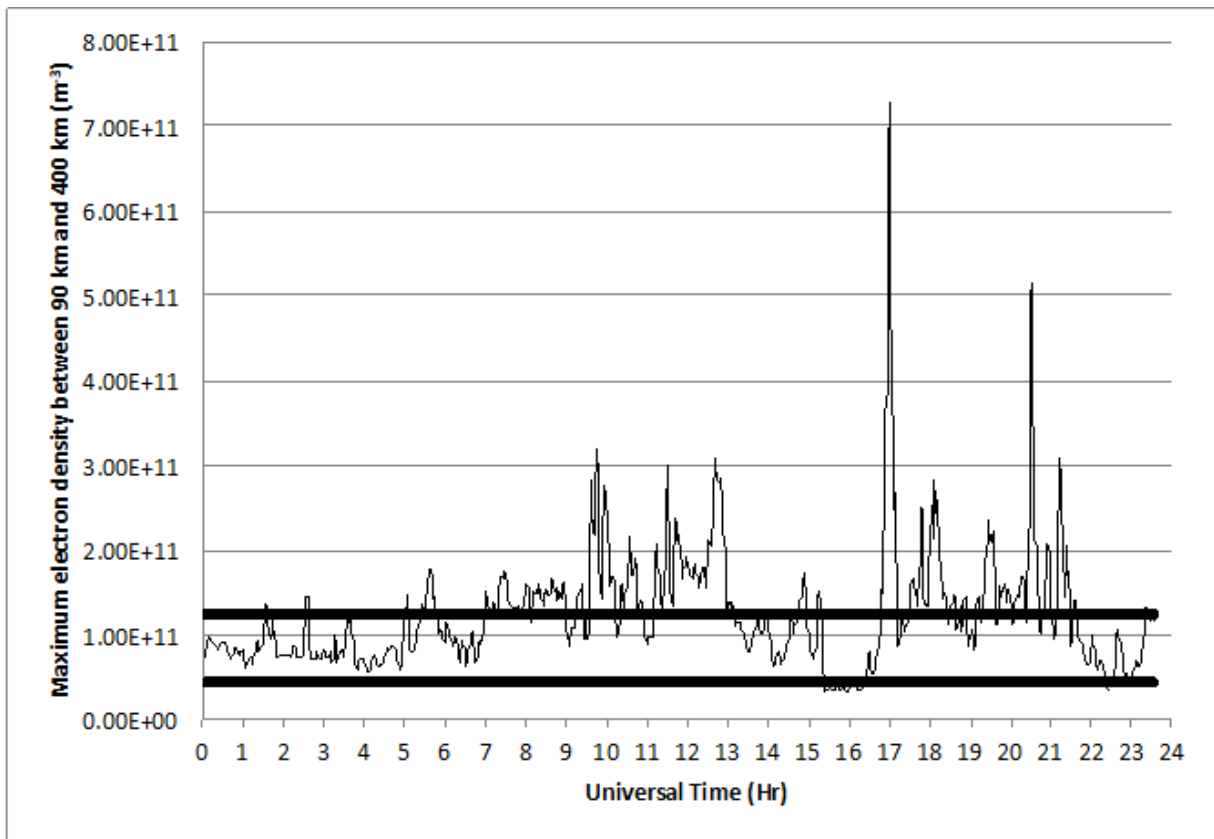

309



310 **Fig. 9. As Fig. 4 but for 10<sup>th</sup> December 2015. A polar hole can be seen between 15:24 and**  
311 **16:25 UT.**

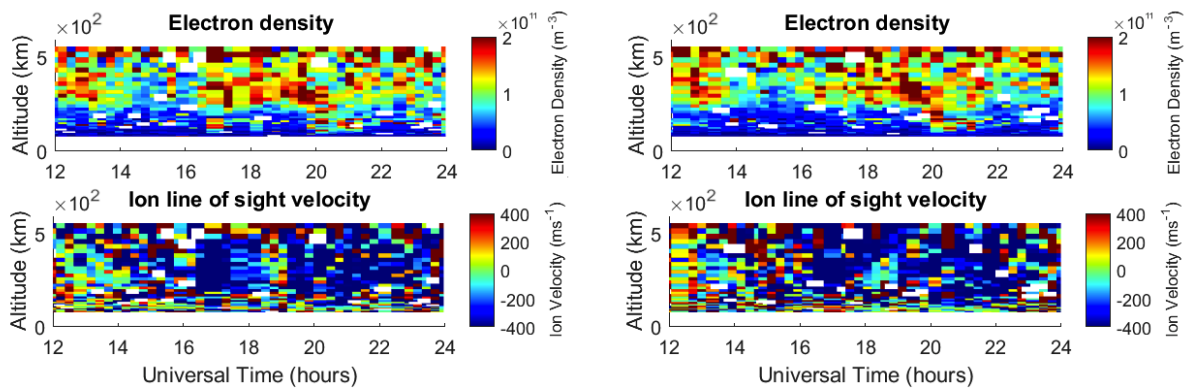

312

313 **Fig. 10. Electron densities and ion drift line of sight velocities observed by the 32 m dish of**  
314 **the ESR at -43° azimuth and 30° elevation (left hand side) and at -14° azimuth and 30°**  
315 **elevation (right hand side) between 12:00 and 23:59 UT on 10<sup>th</sup> December 2015.**

316 The high-latitude convection pattern was inferred from the SuperDARN radars (Fig. 11), with  
317 the location of the polar hole observed in the 42 m ESR observations, and GNSS TEC and phase  
318 scintillation measurements overlaid as in the previous case study. The 32 m ESR observations  
319 (Fig. 9) were directed poleward; indicating that this is a polar hole rather than the ionospheric  
320 trough, which would be located equatorward of the radar. A substantial plasma velocity of  
321 some  $300 \text{ m s}^{-1}$  towards the radar was observed at 16:00 UT, indicating cross-polar flow in the  
322 equatorward direction. The high-latitude convection pattern inferred from the SuperDARN  
323 radars also shows antisunward cross-polar flow, but with a more asymmetric convection  
324 pattern than was observed on 17<sup>th</sup> December 2014. On 10<sup>th</sup> December 2015 there was a clear  
325 dominant dusk cell, drawing plasma across the polar cap from the pre-noon sector. The polar  
326 hole observed with the 42 m dish of the ESR was in the sunward return flow in the dusk  
327 convection cell.

328 The phase scintillation plot for 15:16 to 16:14 UT (upper right panel of Fig. 11) has some  
329 satellite trajectories passing through the hole boundary, but displays no significant  
330 scintillation on any of the paths. The later plot (second panel from the bottom on the right  
331 panel of Fig. 11) does contain phase scintillation seen however none of the elevated  
332 scintillation matches up to hole boundaries, instead, the scintillation is seen in regions of high  
333 and elevated electron density.

334

335

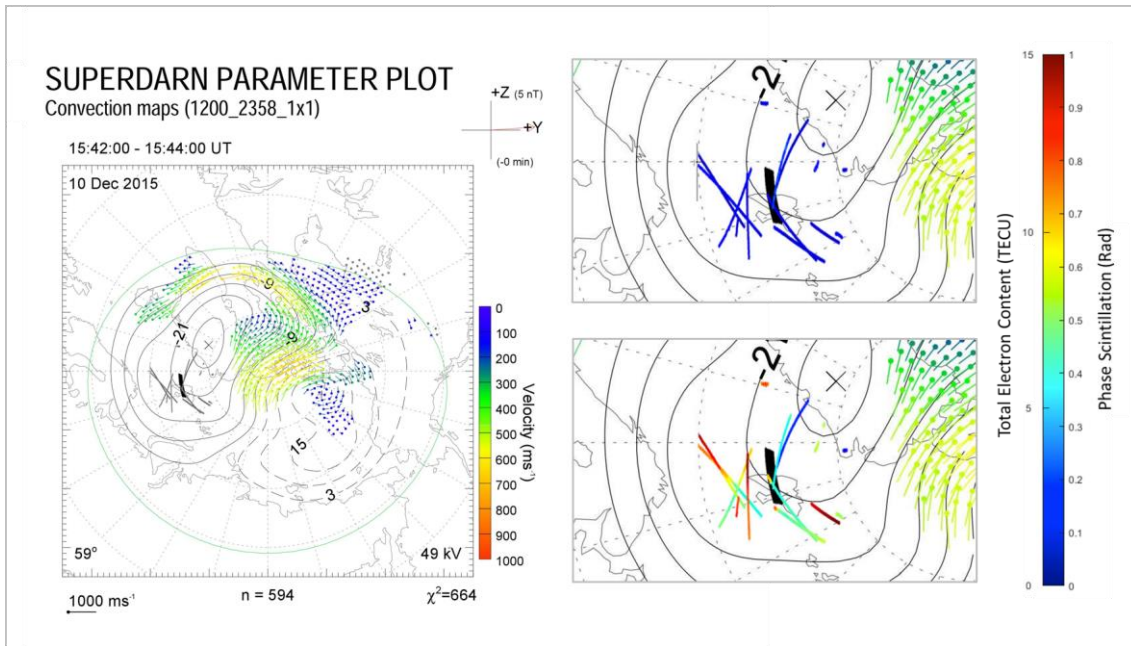

336

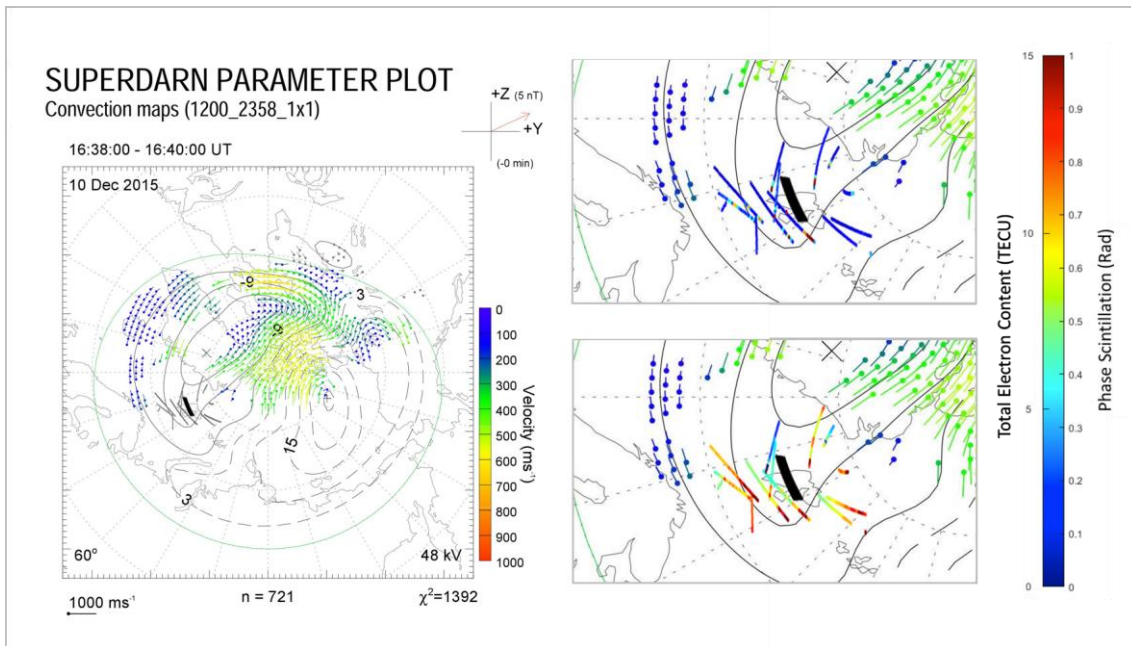

337

338 **Fig. 11. Electric potential patterns inferred from the SuperDARN radars for 15:42 UT and**  
339 **16:38 UT on 10<sup>th</sup> December 2015, with data from GNSS satellites overlaid in the same format**  
340 **as Fig. 5. The intervals for which the satellite passes were plotted are from 15:16-16:14 UT**  
341 **(15:42 UT plot) and from 16:14-17:04 UT (16:38 UT plot).**

342

## 343 **Discussion**

344 A series of polar ionospheric holes have been detected in the high latitude nightside  
345 ionosphere in case studies close to winter solstice, under varying solar intensities and  
346 geomagnetic disturbance levels. The first study on 17<sup>th</sup> December 2014 saw high levels of solar  
347 activity (198.5 sfu) and quiet geomagnetic conditions. The second case study, on 10<sup>th</sup>  
348 December 2015 also had lower levels of solar activity of (108.5 sfu), but had more active  
349 geomagnetic conditions ( $K_p=3$ ) than in the previous study. A third case study, under quiet  
350 geophysical conditions ( $K_p\leq 2$ ) and moderate solar activity (F10.7 cm solar flux = 116.7 sfu) on  
351 12<sup>th</sup> December 2015 showed similar results (not shown).

352 Ionospheric polar holes contain much lower electron densities than those detected through  
353 the rest of the day, this study used the maximum density at a given time dropping 35% below  
354 the daily average maximum density to identify these holes. The changes in electron density  
355 are associated with large electron density gradients. Table 1 shows the electron density  
356 gradients and average hole electron density, based on observations from the ESR 42 m. The  
357 average polar hole density observed in this study is comparable to those previously reported  
358 of  $10^8$ - $10^{11}$  electrons·m<sup>-3</sup> (Obara and Oya, 1989, Benson and Grebowsky, 2001). Steep electron  
359 density gradients are observed at the edges of the holes, these are expressed in units of  
360  $\Delta N_e \cdot m^{-3} \cdot h^{-1}$ . Although these gradients are expressed in units of h<sup>-1</sup> they were calculated from  
361 successive observations by the ESR 42 m (these measurements are typically one minute  
362 apart). The spatial extent of these holes was at least several hundred kilometres, as inferred  
363 from the GNSS TEC measurements (all studies) and the ESR 32 m observations (case study  
364 from 17<sup>th</sup> December 2014). Polar holes are usually associated with quiet geomagnetic  
365 conditions ( $K_p < 2$ ). It is notable that, on 10<sup>th</sup> December 2015, a polar hole was observed under  
366 more active geomagnetic conditions ( $K_p=3$ ).

| Date       | 1 <sup>st</sup> Edge<br>$\Delta N_e \cdot m^{-3} \cdot h^{-1}$ | 2 <sup>nd</sup> Edge<br>$\Delta N_e \cdot m^{-3} \cdot h^{-1}$ | Average Hole<br>$N_e \cdot m^{-3}$ |
|------------|----------------------------------------------------------------|----------------------------------------------------------------|------------------------------------|
| 17/12/2014 | 1.0E+11                                                        | 9.1E+10                                                        | 4.0E+10                            |
| 10/12/2015 | 3.5E+11                                                        | 1.6E+11                                                        | 2.2E+10                            |
| 12/12/2015 | 7.9E+10                                                        | 1.0E+11                                                        | 1.8E+10                            |

Table 1 – The electron density gradient at each edge of the polar hole and the average electron density inside the hole at 350 km observed by ESR 42 m.

367

368 The IMF conditions during the time when the polar holes were observed, and for several hours  
369 beforehand, were appropriate for antisunward cross-polar convection. The ground level solar  
370 terminator for winter is only above 70° MLAT between 15 UT and slightly after 21 UT, reaching  
371 a maximum latitude of just under 76° MLAT on the dayside at around 21 UT, creating the  
372 possibility that plasma within the high-latitude convection pattern could circulate in perpetual  
373 darkness, thus undergoing recombination whilst simultaneously being insulated from  
374 photoionisation, or precipitation, creating a polar hole.

375 Phase scintillation has previously been observed to coincide with large plasma gradients such  
376 as on the edge of ionospheric enhancements such as polar cap patches (Jin et al., 2017), the  
377 tongue of ionisation (van der Meeren et al., 2014), plasma structures associated with the  
378 aurora (Kinrade et al., 2013; Oksavik et al., 2015; van der Meeren et al., 2015) and the mid-  
379 latitude trough (Pryse et al., 1991). The structures that cause scintillation arise due to the  
380 Gradient Drift Instability and/or the Kelvin Helmholtz Instability (Keskinen and Ossakow, 1983;  
381 Carlson et al., 2008). In the present study, once the boundaries and the large electron density  
382 gradients associated with them were identified these boundaries were investigated for  
383 elevated levels of phase scintillation. A threshold of 0.2 rad was used, the purpose of this low  
384 value was to ensure that any possible indication of phase scintillation was included. Across all  
385 of the observed GNSS points coinciding with the polar hole boundaries no such levels of phase  
386 scintillation were detected. Phase scintillation usually dominates at high latitude (e.g., Prikryl  
387 et al., 2015), although amplitude scintillation has also been observed (e.g. Mitchell et al.,  
388 2005). The present study focuses upon phase scintillation as no amplitude scintillation,  
389 defined as when the S4 index was greater than 0.2, was observed on any of the TEC gradients  
390 at the boundaries of the polar holes.

391 This is not the first time a plasma density enhancement has been observed without  
392 corresponding phase scintillation. Van der Meeren et al. (2016) observed a Sun-aligned polar  
393 cap arc under quiet geomagnetic conditions without corresponding scintillation. In the  
394 present study some phase scintillation was observed, however, these points coincide with  
395 increases in TEC and the edges of spikes in electron densities at other locations. In the second  
396 case study (10<sup>th</sup> December 2015) phase scintillation was observed at a point associated with  
397 elevated TEC (lower right panels of Fig. 11), but this was not associated with the assumed  
398 boundary of the polar hole.

399 When phase scintillation was observed it was always associated with electron density  
400 gradients, but converse is not always true. Therefore it appears that some minimum level of  
401 overall electron density is needed for phase scintillation to occur. Given that it is the presence  
402 of small scale structures that cause scintillation, this suggests that these small scale structures  
403 have not arisen.

404 Figure 12 shows phase scintillation as a function of TEC and TEC rate of change. This figure  
405 also includes data from a third study, using data from 12<sup>th</sup> December 2015, which was  
406 consistent with the interpretation presented here, but which has been omitted in the interest  
407 of concision. Low scintillation can be seen at all TEC levels and for a majority of the range of  
408 TEC rates of change. On the other hand, elevated scintillation levels are only seen above  
409 approximately 6 TECU suggesting that a minimum electron density is required. This is not a  
410 new idea, in his review paper Aarons (1982) commented 'if the ionosphere is perturbed on a  
411 percentage basis, *change in N* in the trough will be small since *N* is low; scintillations will then  
412 be low.' The current paper provides observational evidence to support this suggestion that a  
413 minimum electron density is required. The current paper is also consistent with suggestions  
414 made by Prikryl et al. (2015), where the strongest phase scintillations were found to be highly  
415 collocated with regions that are ionospheric signatures of the coupling between the solar  
416 wind and magnetosphere. Polar holes appear to be areas of weak coupling, hence less  
417 scintillation.

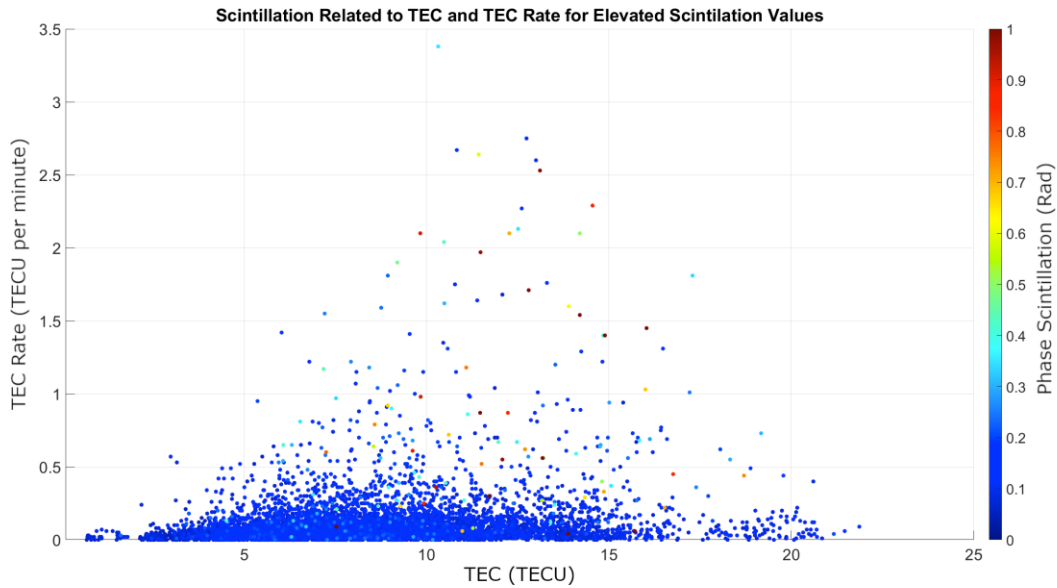

418

419 **Fig. 12 – Phase scintillation as a function of TEC and the TEC rate of change per minute for**  
 420 **17<sup>th</sup> December 2014, 12<sup>th</sup> December 2015 and 10<sup>th</sup> December 2015.**

421 In this study the phase scintillation index ( $\sigma_\phi$ ) has been calculated across a 60 second interval,  
 422 in line with common practice within this field. However, if this index was computed across a  
 423 shorter time interval, then it is possible that elevated values of  $\sigma_\phi$  may be associated with the  
 424 edge of the polar hole. This would be an interesting topic for a future paper. Further  
 425 developments upon this work would expand the observations of the polar holes discussed to  
 426 a larger number of examples under a wider range of geophysical conditions. Polar ionospheric  
 427 holes could be tracked by making observations with a higher temporal resolution at a large  
 428 number of regularly spaced locations. The advent of EISCAT-3D (McCrea et al., 2015), which  
 429 will give unprecedented temporal and spatial coverage, will enable such studies in the  
 430 European sector of the high-latitude ionosphere. The ability to observe the evolution of polar  
 431 holes over time will give a new, deeper, understanding of these features and how they  
 432 influence practical radio systems such as GNSS.

### 433 **Conclusions**

434 Polar ionospheric holes are regions of electron density depletions containing large electron  
 435 density gradients at their boundaries. These holes were observed during geomagnetically  
 436 quiet and moderately disturbed conditions and under a range of solar activities using the  
 437 EISCAT Svalbard Radar (ESR) and measurements from GNSS receivers. Steep electron density

438 gradients have been associated with phase scintillation at GNSS frequencies in previous  
439 studies, however no enhanced scintillation was detected upon the electron density gradients  
440 at these boundaries. Phase scintillation was only observed when electron density levels were  
441 elevated above 6 TECU and a gradient was present implying that both a minimum electron  
442 density level and a sharp gradient in the electron density must be present for instability  
443 mechanisms to produce scintillation structures.

## 444 **Author contribution**

445 This work was led by Luke Jenner, under the guidance of Alan Wood. Kjellmar Oksavik provided  
446 the GNSS TEC and scintillation data, together with guidance regarding their interpretation. Tim  
447 Yeoman and Alexandra Fogg provided the SuperDARN electric potential maps, together with  
448 guidance regarding their interpretation. Anthea Coster provided the TEC maps, together with  
449 guidance regarding their interpretation. All authors contributed to the discussion. The  
450 manuscript was prepared by Luke Jenner and Alan Wood.

## 451 **Competing interests**

452 The authors declare that they have no conflict of interest.

## 453 **Acknowledgements**

454 EISCAT is an international facility supported by the national science councils of China, Finland,  
455 Japan, Norway, Sweden, and the United Kingdom. The assistance of Ingemar Häggström and  
456 colleagues at the EISCAT Scientific Association in running the experiments is gratefully  
457 acknowledged. The data used in this paper is publicly available at <https://www.eiscat.se>. The  
458 assistance of Steve Crothers and Matthew Wild at Rutherford Appleton Laboratory with the  
459 data processing is gratefully acknowledged. The GNSS TEC and scintillation data were provided  
460 by Kjellmar Oksavik at the University of Bergen, and is supported by the Norwegian Research  
461 Council under contracts 212014 and 223252. The authors acknowledge the use of SuperDARN  
462 data, data for which is available at <https://vt.superdarn.org>. SuperDARN is a collection of  
463 radars funded by national scientific funding agencies of Australia, Canada, China, France, Italy,  
464 Japan, Norway, South Africa, United Kingdom and the United States of America.' Alexandra

465 Fogg is supported by a studentship from the Science and Technology Facilities Council (UK).  
466 The assistance of Nathan Brown with the production of Fig. 5 and Fig. 11 is gratefully  
467 acknowledged. GPS TEC data products and access through the Madrigal distributed data  
468 system are provided to the community (<http://www.openmadrigal.org>) by the Massachusetts  
469 Institute of Technology (MIT) under support from US National Science Foundation grant AGS-  
470 1242204. Data for TEC processing is provided from the following organizations: UNAVCO,  
471 Scripps Orbit and Permanent Array Center, Institut Geographique National, France,  
472 International GNSS Service, The Crustal Dynamics Data Information System (CDDIS), National  
473 Geodetic Survey, Instituto Brasileiro de Geografia e Estatística, RAMSAC CORS of Instituto  
474 Geográfico Nacional de la República Argentina, Arecibo Observatory, Low-Latitude  
475 Ionospheric Sensor Network (LISN), Topcon Positioning Systems, Inc., Canadian High Arctic  
476 Ionospheric Network, Centro di Ricerche Sismologiche, Système d'Observation du Niveau des  
477 Eaux Littorales (SONEL), RENAG : REseau NATional GPS permanent, GeoNet - the official source  
478 of geological hazard information for New Zealand, GNSS Reference Networks, Finnish  
479 Meteorological Institute, and SWEPOS - Sweden. Access to these data is provided by madrigal  
480 network via: <http://cedar.openmadrigal.org/>. The  $K_p$  index and F10.7 cm solar flux were  
481 obtained from the UK Solar System Data Centre at Rutherford Appleton Laboratory. These can  
482 be accessed at <https://www.ukssdc.ac.uk/>. The IMF data were provided by N. Ness and  
483 obtained from the CDAWeb at <https://cdaweb.gsfc.nasa.gov/>.

484



## 485 **References**

- 486 Aarons, J.: Global Morphology of Ionospheric Scintillations, Proceedings of the IEEE, 70, 4,  
487 360-378, doi: 10.1109/PROC.1982.12314, 1982.
- 488 Alfonsi, L., Spogli, L., De Franceschi, G., Romano, V., Aquino, M., Dodson, A., and Mitchell C.  
489 N.: Bipolar climatology of GPS ionospheric scintillation at solar minimum, Radio Sci. , 46,  
490 RS0D05, doi:10.1029/2010RS004571, 2011.
- 491 Anderson, D. N., Buchau, J., and Heelis R. A.: Origin of density enhancements in the winter  
492 polar cap ionosphere, Radio Sci., 23, 513-519, doi: 10.1029/RS023i004p00513, 1988.
- 493 Benson, R., and Grebowsky, J.: Extremely low ionospheric peak altitudes In the polar hole  
494 region, Radio Sci., 36, 277-285, doi:10.1029/1999rs002401, 2001.
- 495 Briggs, B.H., and Parkin I. A.: On the variation of radio star and satellite scintillation with zenith  
496 angle, J. Atmos. Terr. Phys., 25, 339-365, doi:10.1016/0021-9169(63)90150-8, 1963.
- 497 Brinton, H., Grebowsky, J., and Brace L.: The high-latitude winter F-region at 300 km: Thermal  
498 plasma observations from Ae-C, J. Geophys. Res., 83, 4767-4776,  
499 doi:10.1029/Ja083ia10p04767, [https://doi.org/10.1016/0273-1177\(91\)90317-D](https://doi.org/10.1016/0273-1177(91)90317-D), 1978.
- 500 Buchau, J. and Reinisch, B. W.: Electron density structures in the polar F region, Adv. Space  
501 Res., 11(10), 29-37, 1991.
- 502 Buchau, J., Reinisch, B. W., Weber, E. J., and Moore, J. G.: Structure and dynamics of the winter  
503 polar cap F region, Radio Sci., 18, 995-1010, <https://doi.org/10.1029/RS018i006p00995>, 1983.
- 504 Carlson, H. C., Oksavik, K., Moen, J., van Eyken, A.P., and Guio, P.: ESR mapping of polar-cap  
505 patches in the dark cusp, Geophys. Res. Lett., 29 (10), 1386, doi:10.1029/2001GL014087,  
506 2002.
- 507 Carlson, H. C., Oksavik, K., Moen, J., and Pedersen, T.: Ionospheric patch formation: Direct  
508 measurements of the origin of a polar cap patch, Geophys. Res. Lett., 31, L08806,  
509 doi:10.1029/2003GL018166, 2004.

510

511 Carlson, H. C., Moen, J., Oksavik, K., Nielsen, C. P., McCrea, I. W., Pedersen, T. R., and Gallop,  
512 P.: Direct observations of injection events of subauroral plasma into the polar cap, *Geophys.*  
513 *Res. Lett.*, 33, L05103, doi:10.1029/2005GL025230, 2006.

514 Carlson, H., Oksavik, K., and Moen, J.: On a new process for cusp irregularity production,  
515 *Ann. Geophys.*, 26, 2871-2885, doi:10.5194/angeo-26-2871-2008, 2008.

516 Cervera, M., and Thomas, R.: Latitudinal and temporal variation of equatorial ionospheric  
517 irregularities determined from GPS scintillation observations, *Ann. Geophys.*, 24, 3329-3341,  
518 doi:10.5194/Angeo-24-3329-2006, doi: 10.5194/angeo-24-3329-2006, 2006.

519 Chisham, G., Lester, M., Milan, S. E., Freeman, M. P., Bristow, W. A., Grocott, A., McWilliams,  
520 K. A., Ruohoniemi, J. M., Yeoman, T. K., Dyson, P. L., Greenwald, R. A., Kikuchi, T., Pinnock, M.,  
521 Rash, J. P. S., Sato, N., Sofko, G. J., Villain, J.-P., and Walker, A. D. M.: A decade of the Super  
522 Dual Auroral Radar Network (SuperDARN): Scientific achievements, new techniques and  
523 future directions, *Surv. Geophys.*, 28, 33–109, doi:10.1007/s10712-007-9017-8, 2007.

524 Cowley, S.W.H. and Lockwood, M.: Excitation and decay of solar-wind driven flows in the  
525 magnetosphere-ionosphere system, *Ann. Geophys.*, 10, 103, 1992.

526 Crowley, G.: Critical Review of patches and blobs, in *Polar Cap Boundary Phenomena*, in: *URSI*  
527 *Review of Radio Science 1993-1996*, edited by Stone, W. R., published for the International  
528 Union of Radio Science, Oxford University Press, 619-648, doi:10.1029/2009JA014985, 1996.

529 De Franceschi, G., Spogli, L., Alfonsi, L. et al. The ionospheric irregularities climatology over  
530 Svalbard from solar cycle 23. *Sci Rep* 9, 9232 (2019) doi:10.1038/s41598-019-44829-5

531 Elmas, Z., Forte, B. and Aquino, A.: The impact of ionospheric scintillation on the GNSS receiver  
532 signal tracking performance and measurement accuracy, *URSI General Assembly and*  
533 *Scientific Symposium*, doi 10.1109/URSIGASS.2011.6123719, 2011.

534 Forte B. (2005), Optimum detrending of raw GPS data for scintillation measurements at  
535 auroral latitudes, *Journal of Atmospheric and Solar-Terrestrial Physics*, Vol. 67, N. 12,  
536 doi:10.1016/j.jastp.2005.01.011.

537 Forte, B., and Radicella, S.: Problems in data treatment for ionospheric scintillation  
538 measurements, *Radio Sci.*, 37, 81-85, doi:10.1029/2001rs002508, 2002.

539 Foster, J. C.: Ionospheric signatures of magnetospheric convection, *J. Geophys. Res.*, 89, 855-  
540 865, 10.1029/JA089iA02p00855, 1984.

541 Fremouw, E. J., Leadabrand, R. L., Livingston, R. C., Cousins, M. D., Rino, C. L., Fair, B. C., and  
542 Long, R. A.: Early results from the DNA wideband satellite experiment—Complex-signal  
543 scintillation, *Radio Sci.*, 13, 167–187, doi:10.1029/RS013i001p00167, 1978.

544 Greenwald, R. A., Baker, K. B., Dudeney, J. R., Pinnock, M., Jones, T. B., Thomas, E. C., Vilain,  
545 J. P., Cerisier, J. C., Senior, C., Hanuise, C., Hunsucker, R. D., Sofko, G., Koehler, J., Neilsen, E.,  
546 Pellinen, R., Walker, A. D. M., Sato, N., and Yamagishi, H.: DARN/SuperDARN: A global view  
547 of high latitude convection, *Space Sci. Rev.*, 71, 761-796. doi:10.1007/BF00751350, 1995.

548 Hapgood, M. (2017), Satellite navigation—Amazing technology but insidious risk: Why  
549 everyone needs to understand space weather, *Space Weather*, 15, 545–548,  
550 doi:10.1002/2017SW001638.

551 Jin, Y., Moen, J. I., Miloch, W. J., Clausen, L. B. N., and Oksavik, K.: Statistical study of the GNSS  
552 phase scintillation associated with two types of auroral blobs, *J. Geophys. Res. Space Physics*,  
553 121, doi:10.1002/2016JA022613, 2016.

554 Jin, Y., Moen, J., Oksavik, K., Spicher, A., Clausen, L., Miloch, W.: GPS scintillations associated  
555 with cusp dynamics and polar cap patches. *J. Space Weather Space Clim.*, 7, A23  
556 doi:10.1051/swsc/2014019, 2017.

557 Jones, D. G., Walker I. K., and Kersley, L.: Structure of the poleward wall of the trough and the  
558 inclination of the geomagnetic field above the EISCAT radar, *Ann. Geophys.*, 15, 740-746,  
559 <https://doi.org/10.1007/s00585-997-0740-8>, 1997.

560 Kersley, L., Russell, C. D., and Rice, D. L.: Phase scintillation and irregularities in the northern  
561 polar ionosphere, *Radio Sci.*, 30, 619, doi:10.1029/94RS03175,1995.

562 Kersley, L., Jenkins, D. B., and Edwards, K. J.: *Nature Phys .Sci.*, 239, 11, 1972.

563 Keskinen, M. J. and Ossakow, S. L.: Theories of high-latitude ionospheric irregularities: A  
564 review, *Radio Sci.*, 18, 1077-1091, doi:10.1029/RS018i006p01077, 1983.

565 Kinrade, J., Mitchell, C. N., Smith, N. D., Ebihara, Y., Weatherwax, A. T., and Bust, G. S.: GPS  
566 phase scintillation associated with optical auroral emissions: First statistical results from the  
567 geographic South Pole, *J. Geophys. Res. Space Physics*, 118, 2490–2502,  
568 doi:10.1002/jgra.50214, 2013.

569 Lockwood, M., and Carlson, H. C.: Production of polar cap electron density patches by  
570 transient magnetopause reconnection, *Geophys. Res. Lett.*, 19, 1731 – 1734, 1992.

571 McCaffrey, A. M., & Jayachandran, P. T. ( 2019). Determination of the refractive contribution  
572 to GPS phase “scintillation”. *Journal of Geophysical Research: Space Physics*, 124, 1454– 1469.  
573 <https://doi.org/10.1029/2018JA025759>

574 McCrea, I., Aikio, A., Alfonsi, L., Belova, E., Buchert, S., Clilverd, M., Engler, N., Gustavsson, B.,  
575 Heinselman, C., Kero, J., Kosch, M., Lamy, H., Leyser, T., Ogawa, Y., Oksavik, K., Pellinen-  
576 Wannberg, A., Pitout, F., Rapp, M., Stanislawska, I., and Vierinen, J.: The science case for the  
577 EISCAT\_3D radar, *Progress in Earth and Planetary Science*, 2:21, doi:10.1186/s40645-015-  
578 0051-8, 2015.

579 Millward, G. H., Moffett, R. J., Balmforth, H. F., and Rodger, A. S.: Modeling the ionospheric  
580 effects of ion and electron precipitation in the cusp, *J. Geophys. Res.*, 104, 24,603,  
581 <https://doi.org/10.1029/1999JA900249>, 1999.

582 Mitchell, C. N., Alfonsi, L., De Franceschi, G., Lester, M., Romano, V., and Wernik, A. W.: GPS  
583 TEC and scintillation measurements from the polar ionosphere during the October 2003  
584 storm, *Geophys. Res. Lett.*, 32, L12S03, doi:10.1029/2004GL021644, 2005.

585 Nishimura, Y., Lyons, L. R., Zou, Y., Oksavik, K., Moen, J. I., Clausen, L. B., Donovan, E. F.,  
586 Angelopoulos, V., Shiokawa, K., Ruohoniemi, J. M., Nishitani, N., McWilliams, K. A., and Lester,  
587 M.: Day-night coupling by a localized flow channel visualized by polar cap patch propagation,  
588 *Geophys. Res. Lett.*, 41, 3701-3709, doi:10.1002/2014GL060301, 2014.

589 Nishitani, N., Ruohoniemi, J. M., Lester, M., Baker, J. B. H., Koustov, A. V., Shepherd, S. G.,  
590 Chisham, G., Hori, T., Thomas, E. G., Makarevich, R. A., Marchaudon, A., Ponomarenko, P.,  
591 Wild, J. A., Milan, S. E., Bristow, W. A., Devlin, J., Miller, E., Greenwald, R. A., Ogawa, T.,  
592 and Kikuchi, T.: Review of the accomplishments of mid-latitude Super Dual Auroral Radar  
593 Network (SuperDARN) HF radars, *Prog. Earth Planet. Sci.*, 6, 27, doi:10.1186/s40645-019-  
594 0270-5, 2019.

595 Obara, T., And Oya, h.: Observations of polar cusp and polar cap ionospheric irregularities and  
596 formation of ionospheric holes using topside sounder onboard Exos-C (Ohzora) satellite,  
597 *Journal of Geomagnetism and Geoelectricity*, 41, 1025-1042, doi:10.5636/Jgg.41.1025, 1989.

598 Oksavik, K., Barth, V. L., Moen, J., and Lester, M.: On the entry and transit of high-density  
599 plasma across the polar cap, *J. Geophys. Res.*, 115, A12308, doi:10.1029/2010JA015817,  
600 2010.

601 Oksavik, K., van der Meeren, C., Lorentzen, D. A., Baddeley, L. J., and Moen, J.: Scintillation  
602 and loss of lock from poleward moving auroral forms in the cusp ionosphere, *J. Geophys. Res.*  
603 *Space Physics*, 120, doi:10.1002/2015JA021528, 2015.

604 Parkinson, M. L., Dyson, P. L., Pinnock, M., Devlin, J. C., Hairston, M. R., Yizengaw, E., and  
605 Wilkinson, P. J.: Signatures of the midnight open-closed magnetic field line boundary during  
606 balanced dayside and nightside reconnection, *Ann. Geophys.*, 20, 1617-1630,  
607 <https://doi.org/10.5194/angeo-20-1617-2002>, 2002.

608 Prikryl, P., Jayachandran, P. T., Chadwick, R., and Kelly, T. D.: Climatology of GPS phase  
609 scintillation at northern high latitudes for the period from 2008 to 2013, *Ann. Geophys.*, 33,  
610 531-545, <https://doi.org/10.5194/angeo-33-531-2015>, 2015.

611 Pryse, S. E., Wood, A.G., Middleton, H. R., McCrea, I. W., and Lester, M.: Reconfiguration of  
612 polar cap plasma in the magnetic midnight sector, *Ann. Geophys.*, 24, 2201-2208,  
613 <https://doi.org/10.5194/angeo-24-2201-2006>, 2006.

614 Pryse S. E., Kersley, L., and Russell C. D.: Scintillation near the F layer trough over northern  
615 Europe, *Radio Science* 26, 4, 1105-1114, <https://doi.org/10.1029/91RS00490>, 1991.

616 Rideout, W. and Coster, A. J.: Automated GPS processing for global total electron content  
617 data, *GPS Solutions*, 10, 219-228, <https://doi.org/10.1007/s10291-006-0029-5>, 2006.

618 Rino, C. L., Livingston, R. C., Tsunoda, R. T., Robinson, R. M., Vickrey, J. F., Senior, C., Cousins,  
619 M. D., Owen, J., and Klobuchar, J. A.: Recent studies of the structure and morphology of  
620 auroral-zone F-region irregularities, *Radio Sci.*, 18, 1167-1180, 10.1029/RS018i006p01167,  
621 1983.

622 Rodger, A. S., Pinnock, M., Dudeney, J. R., Baker, K. B., and Greenwald, R. A.: A new  
623 mechanism for polar patch formation, *J. Geophys. Res.*, 99, 6425-6436,  
624 doi:10.1029/93JA01501, 1994.

625 Ruohoniemi, J. M., and Greenwald, R. A.: Dependencies of high- latitude plasma convection:  
626 Consideration of interplanetary magnetic field, seasonal, and universal time factors in  
627 statistical patterns, *J. Geophys. Res.*, 110, A09204, doi:10.1029/2004JA010815, 2005.

628 Smith, A. M., Mitchell, C. N., Watson, R. J., Meggs, R. W., Kintner, P. M., Kauristie, K., and  
629 Honary, F.: GPS scintillation in the high arctic associated with an auroral arc, *Space Weather*,  
630 6, S03D01, doi:10.1029/2007SW000349, 2008.

631 Sojka, J., Bowline, M., Schunk, R., Decker, D., Valladares, C., Sheehan, R., Anderson, D., and  
632 Heelis, R.: Modeling Polar Cap F-Region Patches Using Time Varying Convection, *Geophys.*  
633 *Res. Lett.*, 20, 1783-1786, Doi:10.1029/93gl01347, 1993.

634 Spogli, L., Alfonsi, L., De Franceschi, G., Romano, V., Aquino, M. H. O., and Dodson, A.:  
635 Climatology of GPS ionospheric scintillations over high and mid-latitude European regions,  
636 *Ann. Geophys.*, 27, 3429-3437, <https://doi.org/10.5194/angeo-27-3429-2009>, 2009.

637 Thomas, E. G., and Shepherd, S. G.: Statistical patterns of ionospheric convection derived from  
638 mid-latitude, high-latitude, and polar SuperDARN HF radar observations, *J. Geophys. Res.*,  
639 123, 3196–3216, <https://doi.org/10.1002/2018JA025280>, 2018.

640 Tsunoda, R. T.: High-latitude F region irregularities: A review and synthesis, *Rev. Geophys.*,  
641 26, 719-760, <https://doi.org/10.1029/RG026i004p00719>, 1988.

642 Valladares, C. E., Decker, D. T., Sheehan, R., Anderson, D. N., Bullett, T. and Reinisch, B. W.:  
643 Formation of polar cap patches associated with north-to-south transitions of the  
644 interplanetary magnetic field, *J. Geophys. Res.*, 103, 14657-14670,  
645 <https://doi.org/10.1029/97JA03682>, 1998.

646 Valladares, C.E., Basu, S., Buchau, J., and Friis-Christensen, E.: Experimental evidence for the  
647 formation and entry of patches into the polar cap, *Radio Sci.*, 29, 167-194, doi:  
648 10.1029/93RS01579, 1994.

649 van der Meeren, C., Oksavik, K., Lorentzen, D., Moen, J. I., and Romano, V.: GPS scintillation  
650 and irregularities at the front of an ionization tongue in the night-side polar ionosphere, *J.*  
651 *Geophys. Res. Space Physics*, 119, 8624–8636, doi:10.1002/2014JA020114, 2014.

652 van der Meeren, C., Oksavik, K., Lorentzen, D. A., Rietveld, M. T., and Clausen, L. B. N.: Severe  
653 and localized GNSS scintillation at the poleward edge of the nightside auroral oval during  
654 intense substorm aurora, *J. Geophys. Res. Space Physics*, 120, 10,607–10,621,  
655 doi:10.1002/2015JA021819, 2015.

656 van der Meeren, C., Oksavik, K., Lorentzen, D. A., Paxton, L. J., and Clausen, L. B. N.: Scintillation  
657 and irregularities from the nightside part of a Sun-aligned polar cap arc, *J. Geophys. Res. Space*  
658 *Physics*, 121, 5723–5736, doi:10.1002/2016JA022708, 2016.

659 Vierinen, J., Coster, A. J., Rideout, W. C., Erickson, P. J., and Norberg, J.: Statistical framework  
660 for estimating GNSS bias, *Atmos. Meas. Tech. Discuss.*, 8, 9373–9398, doi:10.5194/amtd-8-  
661 9373-2015, 2015.

662 Wang, Y., Zhang, Q. - H., Jayachandran, P. T., Moen, J., Xing, Z. - Y., Chadwick, R., et al. (2018).  
663 Experimental evidence on the dependence of the standard GPS phase scintillation index on  
664 the ionospheric plasma drift around noon sector of the polar ionosphere. *Journal of*  
665 *Geophysical Research: Space Physics*, 123, 2370–2378.  
666 <https://doi.org/10.1002/2017JA024805>

667 Wannberg, G., Wolf, I., Vanhainen, L.-G., Koskenniemi, K., Röttger, J., Postila, M., Markkanen,  
668 J. Jacobsen, R., Stenberg, A., Larsen, R., Eliassen, S., Heck, S., and Huuskonen, A.: The EISCAT

- 669 Svalbard radar: A case study in modern incoherent scatter radar system design, *Radio Sci.*, 32,  
670 2283–2308, doi:10.1029/97RS01803, 1997.
- 671 Walker, I. K., Moen, J., Kersley, L., and Lorentzen, D. A.: On the possible role of cusp/cleft  
672 precipitation in the formation of polar-cap patches, *Ann. Geophys.*, 17, 1298-1305,  
673 doi.org/10.1007/s00585-999-1298-4, 1999.
- 674 Weber, E., Buchau, J., Moore, J., Sharber, J., Livingston, R., Winningham, J., and Reinisch, B.:  
675 F-layer ionization patches in the polar cap, *J. Geophys. Res.*, 89, 1683,  
676 doi:10.1029/Ja089ia03p01683, 1984
- 677 Zwickl, R. D., Doggett, K.A., Sahm, S., Barrett, W.P., Grubb, R.N., Detman, T.R., Raben, V.J.,  
678 Smith, C.W., Riley, P., Gold, R.E., Mewaldt, R.A., Maruyama T.: The NOAA Real-Time Solar-  
679 Wind (RTSW) system using ACE data, *Space Sci. Rev.*, 86, 633–648, doi:10.1023/  
680 A:1005044300738, 1998.
